# Supplementary material for: The correlation between surface defects and the behavior of hydrogen adsorption over ZnO under UV light irradiation
Source: Royal Society of Chemistry journal article supplement (doi:10.1039/c8cy00550h), 2018-01-01
Supplement: c8cy00550h1.pdf [file c8cy00550h1.pdf]

# **The correlation between the surface defects and the behavior of hydrogen adsorption over ZnO under UV light irradiation**

*Zhongming Wang<sup>a,b</sup>, Kun Wang<sup>a,b</sup>, Hong Wang<sup>a,b</sup>, Xun Chen<sup>a</sup>, Wenxin Dai<sup>a,b\*</sup>,  
Xianzhi Fu<sup>a\*</sup>*

<sup>a</sup> Research Institute of Photocatalysis, State Key Laboratory of Photocatalysis on Energy and Environment, Fuzhou University, Fuzhou, 350002, China

<sup>b</sup> Key Laboratory of Eco-materials Advanced Technology (Fuzhou University), Fujian Province University, Fuzhou, 350002, China

\*Corresponding author: Wenxin Dai & Xianzhi Fu

Tel & Fax: +86-591-83779083

E-mail: daiwenxin@fzu.edu.cn

### *S1. Spectrogram of the light source used in the experiment*

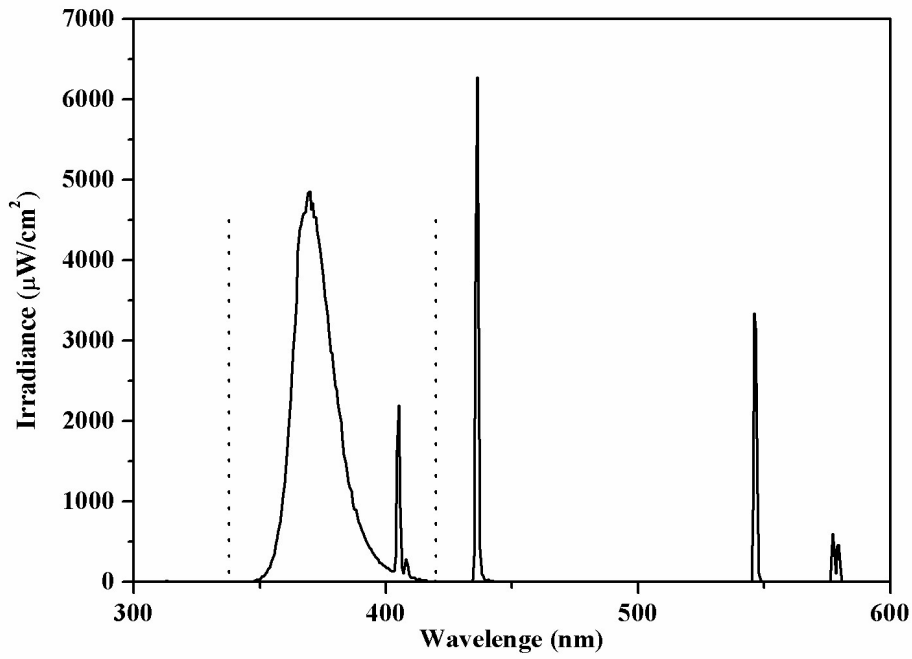

**Fig.S1** Spectrogram of the light source used in the experiment

### *S2. The selected area electron diffraction pattern of Z-3-Air and Z-3-N<sub>2</sub> samples*

The existence of the various crystal planes can be confirmed by the selected area electron diffraction pattern (SAED) <sup>[a]</sup> in Fig.S2. The inset exhibited the {100}, {002}, {101}, {110}, {103} and {112} diffraction spots in selected area diffraction, indicating that these crystal planes exposed in the Z-3-Air and Z-3-N<sub>2</sub> samples. However, the SAED image could not explain the dominant growth of a certain crystal plane.

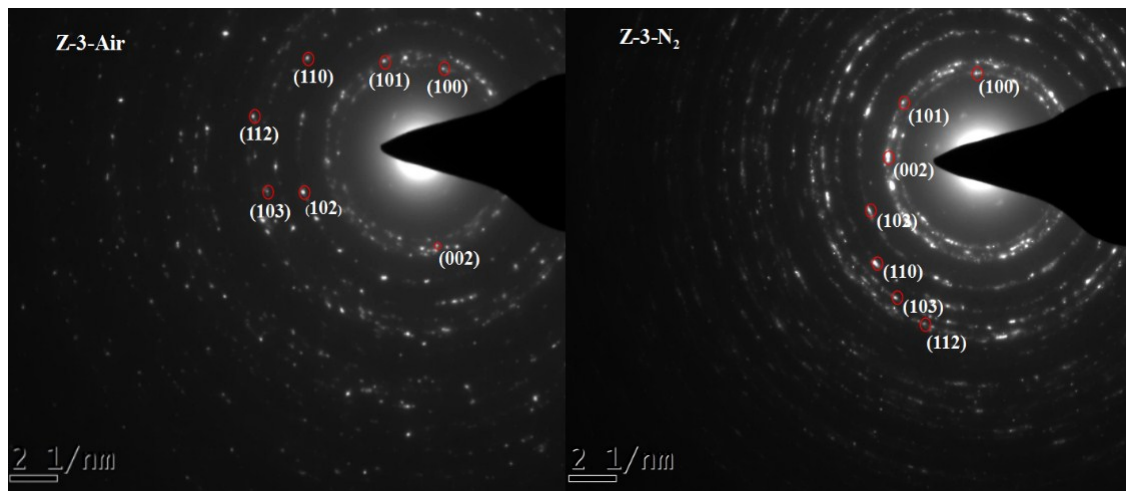

**Fig.S2** The selected area electron diffraction pattern of Z-3-Air and Z-3-N<sub>2</sub> samples

## References

[a] H. G. Yang, C. H. Sun, S. Z. Qiao, J. Zou, G. Liu, S. C. Smith, H. M. Cheng and G. Q. Lu, Anatase TiO<sub>2</sub> single crystals with a large percentage of reactive facets, Nature, 2008, 453, 638.
